# Supplementary material for: DFT and ab initio molecular dynamics simulation study of the infrared spectrum of the protic ionic liquid 2-hydroxyethylammonium formate
Source: Royal Society of Chemistry journal article supplement (doi:10.1039/d3cp02914j), 2023-01-01
Supplement: d3cp02914j1.pdf [file d3cp02914j1.pdf]

## SUPPORTING INFORMATION

### A DFT and *ab initio* molecular dynamics simulation study of the infrared spectrum of the protic ionic liquid 2-hydroxyethylammonium formate

Vitor Hugo Paschoal and Mauro C. C. Ribeiro\*

*Laboratório de Espectroscopia Molecular, Departamento de Química Fundamental,  
Instituto de Química, Universidade de São Paulo, 05513-970 São Paulo, SP, Brazil*

\* corresponding author, email: [mccribei@iq.usp.br](mailto:mccribei@iq.usp.br)

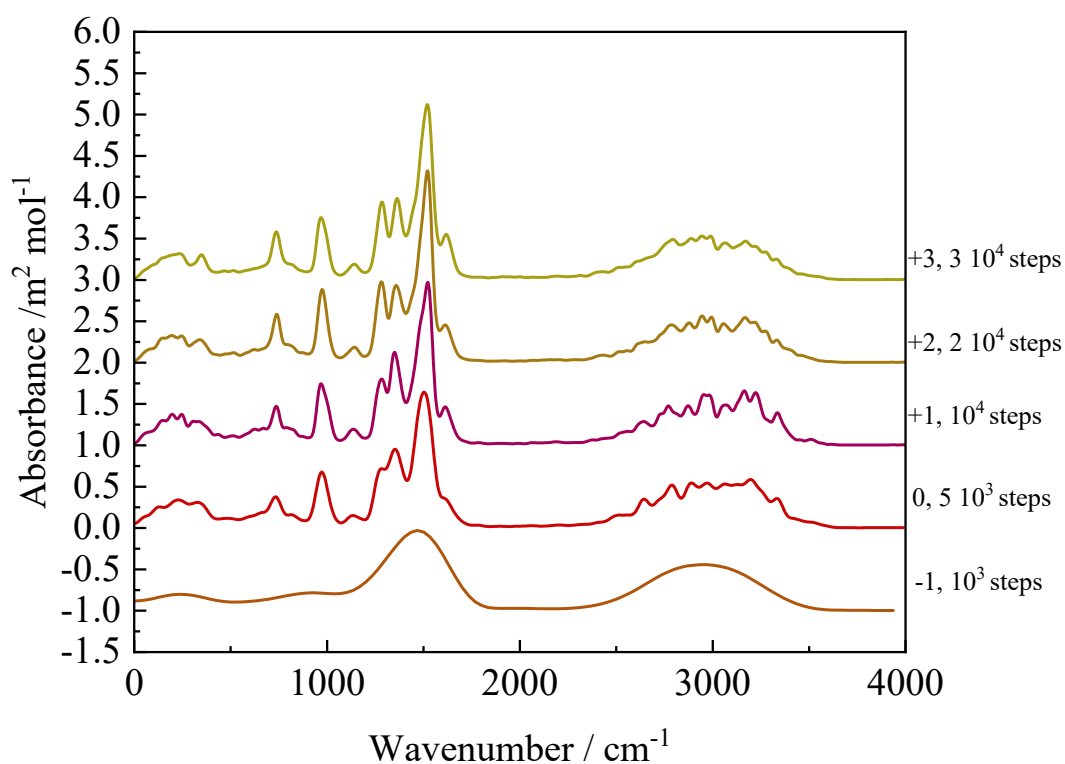

**Figure S1.** Calculated IR spectra from the AIMD trajectory considering different lengths, ranging from  $10^3$  steps (brown line, shifted by -1 units of absorbance) to the whole trajectory,  $3 \times 10^4$  steps (gold line, shifted by three units of absorbance). The spectra are shifted vertically for better visualization.

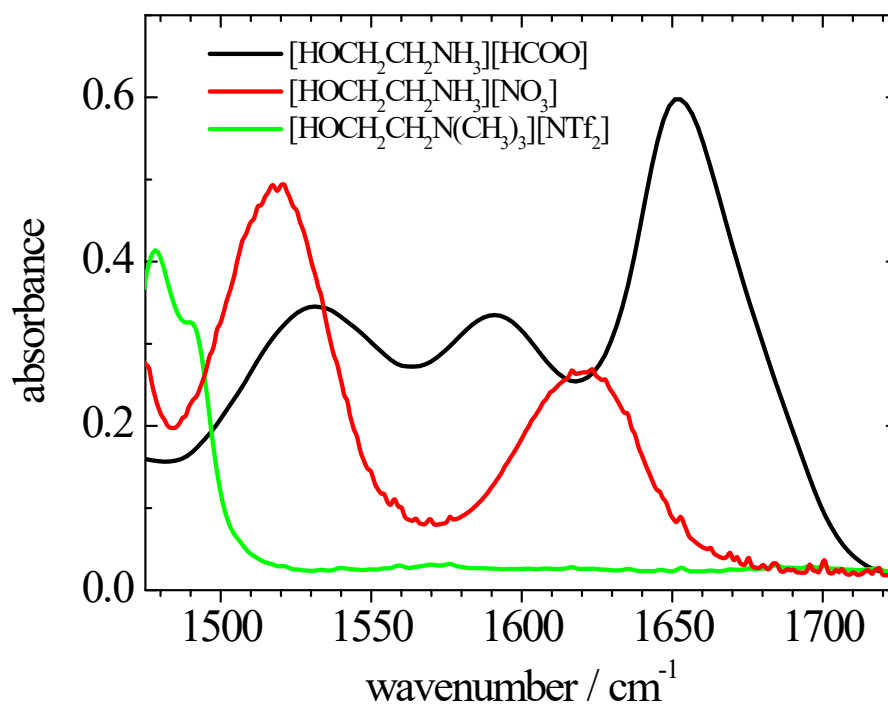

**Figure S2.** The 1500 – 1700 cm<sup>-1</sup> range of the infrared spectrum of the PIL under investigation, [HOCH<sub>2</sub>CH<sub>2</sub>NH<sub>3</sub>][HCOO] (black line), compared with the spectra of 2-hydroxyethylammonium nitrate, [HOCH<sub>2</sub>CH<sub>2</sub>NH<sub>3</sub>][NO<sub>3</sub>] (red line), and choline bis(trifluoromethanesulfonyl)imide, [HOCH<sub>2</sub>CH<sub>2</sub>(NH<sub>3</sub>)<sub>3</sub>][NTf<sub>2</sub>] (green line).

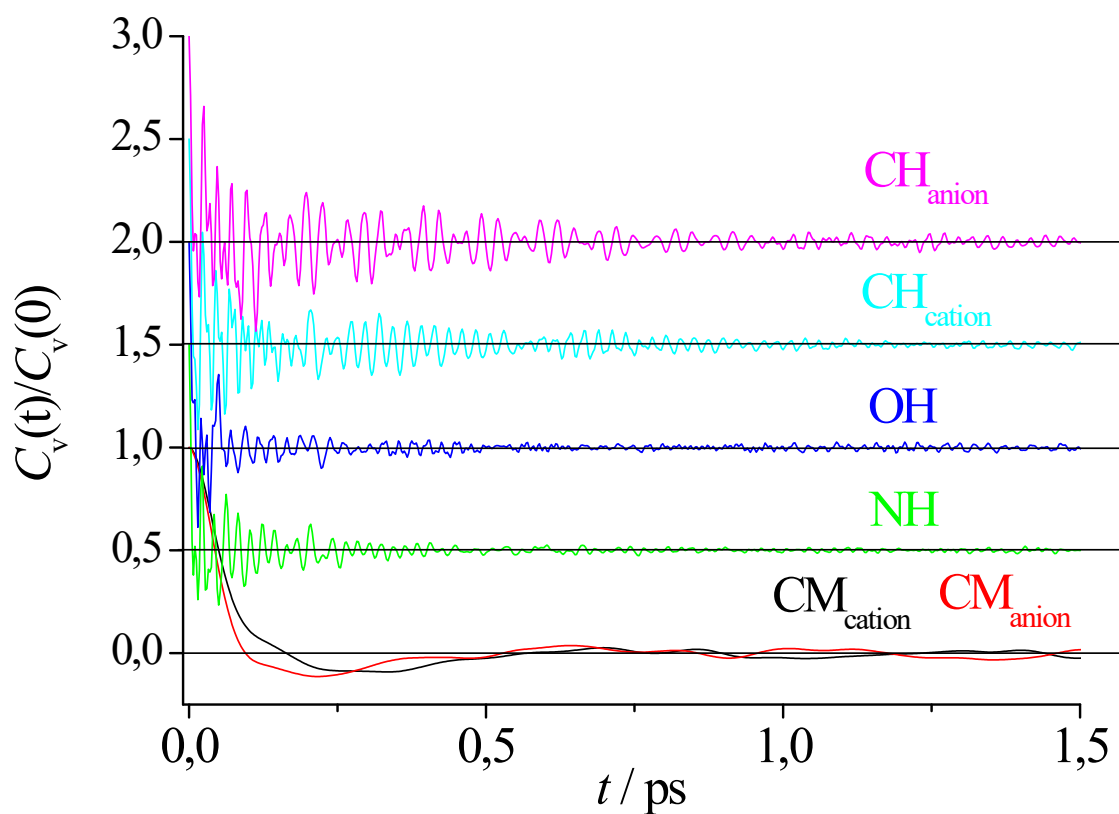

**Figure S3.** Single-particle time correlation functions of velocities,  $C_v(t) = \langle \mathbf{v}_i(0) \cdot \mathbf{v}_i(t) \rangle$ , calculated by the AIMD simulation of  $[\text{HOCH}_2\text{CH}_2\text{NH}_3][\text{HCOO}]$ . The functions were normalized by its initial value,  $C_v(0)$ , and the upper four functions were vertically shifted by 0.5 to help visualization. The black and red colored  $C_v(t)$  at the bottom correspond, respectively, to the cation and anion center-of-mass velocity. The others  $C_v(t)$  correspond to velocities of selected atoms as indicated in the figure: N and H atoms of the cation  $\text{NH}_3$  group (green line), O and H atoms of the cation OH group (blue line), C and H atoms of the cation  $\text{CH}_2$  groups (cyan line), and C and H atoms of the anion (magenta line).

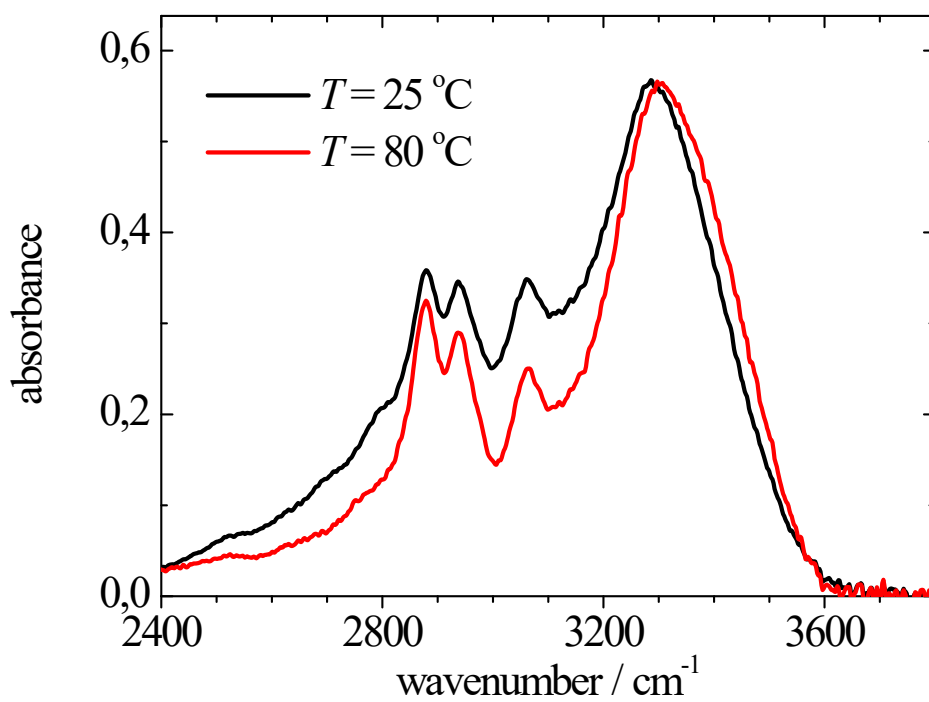

**Figure S4.** Infrared spectra of [HOCH<sub>2</sub>CH<sub>2</sub>NH<sub>3</sub>][HCOO] at 25 °C (black line) and 80 °C (red line). The intensities have been normalized by the highest intensity peak.

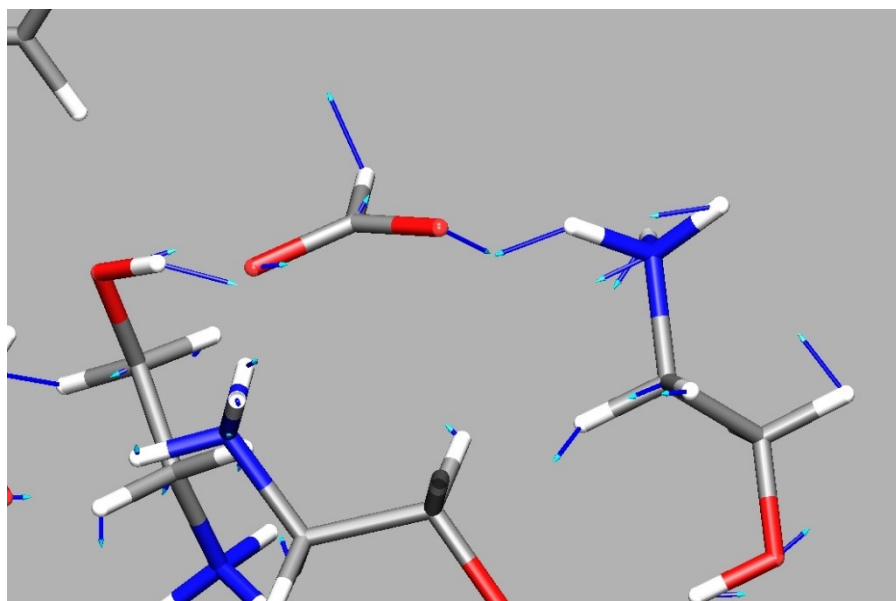

**Figure S5.** Atomic displacements of the normal mode calculated by DFT at  $217\text{ cm}^{-1}$ . The image only emphasizes a portion of the four-ionic pair cluster in order to facilitate better viewing.
